# Supplementary material
Source: Springer Nature journal article supplement (https://www.springermedizin.de/resource/supplementary/12889_2012_5766_MOESM1_ESM.pdf/9496174)
Supplement: MOESM1 [file 9496174]

Table 1: Description of studies on the association between physical activity and weight gain / obesity.

| Author Year               | Study                                     | Baseline – measuring points                                         | Follow up time | Baseline sample; Age at Baseline                       | Drop out                                               | Sample in Survey       | Variables - PA; Outcome                                                                                                                                                                                   | Results                                                                                                                                                                                                                                                                                                                                                                                                                           | Limitations                                                                                                                                                   |
|---------------------------|-------------------------------------------|---------------------------------------------------------------------|----------------|--------------------------------------------------------|--------------------------------------------------------|------------------------|-----------------------------------------------------------------------------------------------------------------------------------------------------------------------------------------------------------|-----------------------------------------------------------------------------------------------------------------------------------------------------------------------------------------------------------------------------------------------------------------------------------------------------------------------------------------------------------------------------------------------------------------------------------|---------------------------------------------------------------------------------------------------------------------------------------------------------------|
| DiPietro et al. 2004 [15] | Aerobics Center Longitudinal Study - ACLS | Baseline between 1970 - 1998 (min. 4 examinations during that time) | 5 years        | 216,356 woman-years - 735,554 man-years; 20 - 55 years |                                                        | 2501 men               | PA: 10 specific exercise-related activities within previous 3 months (frequency; duration)<br>Physical Activity Level – energy expenditures (MET) – Daily physical activity level<br>Outcome: Body weight | Daily physical activity level is inversely related to weight gain                                                                                                                                                                                                                                                                                                                                                                 | - results just for men<br>- no common baseline<br>- longitudinal research via person-years and not via overall years<br>- just a subgroup of the basic sample |
| Petersen et al. 2004 [18] | Copenhagen City Heart Study               | Baseline 1976/1978 - 81/83 - 92/93                                  | 10 years       | 14 151 men and 20 – 78 years                           | 1981/19 83: 11085; 1992/19 93: 6542<br>Overall: 10 498 | 3,653 women. 2,626 men | PA: Questionnaire by Saltin & Grimby<br>Outcome: Body weight                                                                                                                                              | Cross-sectional Analyse<br>- Odds Ratios [with 95% Confidence Interval] for weight gain in addition to LTPA level<br><br>Women 1 <sup>st</sup> survey:<br>Low LTPA: 1.00 (Ref.)<br>Medium LTPA: 0.70 [0.59-0.83]<br>High LTPA: 0.51 [0.40-0.64]<br>2 <sup>nd</sup> survey:<br><br>Men 1 <sup>st</sup> survey:<br>Low LTPA: 1.00 (Ref.)<br>Medium LTPA: 0.71 [0.58-0.85]<br>High LTPA: 0.65 [0.52-0.80]<br>2 <sup>nd</sup> survey: | - high drop out rate                                                                                                                                          |

PA = physical activity, MET = metabolic equivalent of task; Ref. = Reference group

|                                |                                                           |                                                                                                                |          |                                                     |                             |                                                 |                                                                                                                                                                                                                 |                                                                                                                                                                                                                                                                                                                                                                                                                                                                                                                                    |                                                                                                                                                                                                                       |  |
|--------------------------------|-----------------------------------------------------------|----------------------------------------------------------------------------------------------------------------|----------|-----------------------------------------------------|-----------------------------|-------------------------------------------------|-----------------------------------------------------------------------------------------------------------------------------------------------------------------------------------------------------------------|------------------------------------------------------------------------------------------------------------------------------------------------------------------------------------------------------------------------------------------------------------------------------------------------------------------------------------------------------------------------------------------------------------------------------------------------------------------------------------------------------------------------------------|-----------------------------------------------------------------------------------------------------------------------------------------------------------------------------------------------------------------------|--|
|                                |                                                           |                                                                                                                |          |                                                     |                             |                                                 |                                                                                                                                                                                                                 | Low LTPA: 1.00 (Ref.)<br>Medium LTPA: 0.75<br>[0.63-0.91]<br>High LTPA: 0.58<br>[0.47-0.72]<br>3 <sup>rd</sup> survey:<br>Low LTPA: 1.00 (Ref.)<br>Medium LTPA: 0.61<br>[0.49-0.76]<br>High LTPA: 0.36<br>[0.27-0.47]                                                                                                                                                                                                                                                                                                              | Low LTPA: 1.00 (Ref.)<br>Medium LTPA: 0.87<br>[0.70-1.08]<br>High LTPA: 0.76<br>[0.61-0.95]<br>3 <sup>rd</sup> survey:<br>Low LTPA: 1.00 (Ref.)<br>Medium LTPA: 0.71<br>[0.54-0.92]<br>High LTPA: 0.52<br>[0.39-0.68] |  |
|                                |                                                           |                                                                                                                |          |                                                     |                             |                                                 |                                                                                                                                                                                                                 | Longitudinal Analyse:<br>- odds ratios [with 95% Confidence Interval] for becoming obese between 2 <sup>nd</sup> and 3 <sup>rd</sup> survey                                                                                                                                                                                                                                                                                                                                                                                        |                                                                                                                                                                                                                       |  |
|                                |                                                           |                                                                                                                |          |                                                     |                             |                                                 |                                                                                                                                                                                                                 | Women<br>Low LTPA: 1.00 (Ref.)<br>Medium LTPA: 0.93<br>[0.59-1.45]<br>High LTPA: 1.35<br>[0.83-2.18]                                                                                                                                                                                                                                                                                                                                                                                                                               | Men<br>Low LTPA: 1.00 (Ref.)<br>Medium LTPA: 1.35<br>[0.73-2.50]<br>High LTPA: 1.93<br>[1.03-3.60]                                                                                                                    |  |
| Gordon-Larsen et al. 2009 [16] | Coronary Artery Risk Development in Young Adults - CARDIA | Baseline: 1985/1986<br>Follow up points: 1987/1988 - 1990/1991 - 1992/1993 - 1995/1996 - 2000/2001 - 2005/2006 | 20 years | 5115 - 30,690<br>observatio<br>ns; 18 - 30<br>years | 90% - 86% - 81% - 79% - 74% | 4995 men and women - 23,633<br>observati<br>ons | PA: Frequency of participation in 13 activity categories (8 vigorous, 5 moderate) over 12 months; exercise units (frequency * intensity)<br><i>Outcome:</i> Body weight measured with a calibrated balance-beam | Inverse association between 30 minutes walking / day and weight gain related to percentile of baseline weight:<br>25 <sup>th</sup> percentile:<br>m: $\beta = -0.07$ kg/y; p = .4<br>w: $\beta = -0.12$ kg/y; p < .001<br>50 <sup>th</sup> percentile:<br>m: $\beta = -0.15$ kg/y; p = .03<br>w: $\beta = -0.29$ kg/y; p < .001<br>75 <sup>th</sup> percentile:<br>m: $\beta = -0.25$ kg/y; p < .001<br>w: $\beta = -0.53$ kg/y; p < .001<br>women's total weight gain (15 year):<br>inactive women: +13 kg<br>active women: +5 kg | - just walking was added in an energy-index - no other sports are included                                                                                                                                            |  |

PA = physical activity, MET = metabolic equivalent of task; Ref. = Reference group

|                            |                                                           |                                                                                                             |          |                                                    |                             |                    |                                                                                                                    |                                                                                                                                                                                                                                                                                                                                                                                                                                                                                                                                                                                           |  |       |     |  |                        |                        |  |                                |                                |  |                               |                               |  |                         |  |  |                             |  |  |                               |  |
|----------------------------|-----------------------------------------------------------|-------------------------------------------------------------------------------------------------------------|----------|----------------------------------------------------|-----------------------------|--------------------|--------------------------------------------------------------------------------------------------------------------|-------------------------------------------------------------------------------------------------------------------------------------------------------------------------------------------------------------------------------------------------------------------------------------------------------------------------------------------------------------------------------------------------------------------------------------------------------------------------------------------------------------------------------------------------------------------------------------------|--|-------|-----|--|------------------------|------------------------|--|--------------------------------|--------------------------------|--|-------------------------------|-------------------------------|--|-------------------------|--|--|-----------------------------|--|--|-------------------------------|--|
| Hankinson et al. 2010 [17] | Coronary Artery Risk Development in Young Adults - CARDIA | Baseline: 1985/1986 Follow up points: 1987/1988 - 1990/1991 - 1992/1993 - 1995/1996 - 2000/2001 - 2005/2006 | 20 years | 5115 - total of 30,690 observations; 18 - 30 years | 90% - 86% - 81% - 79% - 74% | 3554 men and women | PA: CARDIA Physical Activity History questionnaire<br><i>Outcome:</i> Body weight, bod height, waist circumference | Higher activity level is associated with a smaller increase in mean BMI and weight per year, compared with low activity<br><br>Mean BMI change / year relative to lower activity category (less than 340 exercise units (men) and less than 192 exercise units (women) [95 CI]                                                                                                                                                                                                                                                                                                            |  |       |     |  |                        |                        |  |                                |                                |  |                               |                               |  |                         |  |  |                             |  |  |                               |  |
|                            |                                                           |                                                                                                             |          |                                                    |                             |                    |                                                                                                                    | <table border="0"> <tr> <td></td> <td>Women</td> <td>Men</td> </tr> <tr> <td></td> <td>Lower BMI: 1.00 (Ref.)</td> <td>Lower BMI: 1.00 (Ref.)</td> </tr> <tr> <td></td> <td>Moderate BMI: -.05 [-.16- .05]</td> <td>Moderate BMI: -.06 [-.11- .00]</td> </tr> <tr> <td></td> <td>Higher BMI: -.13 [-.19 - .07]</td> <td>Higher BMI: -.05 [-.10 - .03]</td> </tr> <tr> <td></td> <td colspan="2">Total less weight gain:</td> </tr> <tr> <td></td> <td colspan="2">Men – high activity: 2.6 kg</td> </tr> <tr> <td></td> <td colspan="2">Women – high activity: 6.1 kg</td> </tr> </table> |  | Women | Men |  | Lower BMI: 1.00 (Ref.) | Lower BMI: 1.00 (Ref.) |  | Moderate BMI: -.05 [-.16- .05] | Moderate BMI: -.06 [-.11- .00] |  | Higher BMI: -.13 [-.19 - .07] | Higher BMI: -.05 [-.10 - .03] |  | Total less weight gain: |  |  | Men – high activity: 2.6 kg |  |  | Women – high activity: 6.1 kg |  |
|                            | Women                                                     | Men                                                                                                         |          |                                                    |                             |                    |                                                                                                                    |                                                                                                                                                                                                                                                                                                                                                                                                                                                                                                                                                                                           |  |       |     |  |                        |                        |  |                                |                                |  |                               |                               |  |                         |  |  |                             |  |  |                               |  |
|                            | Lower BMI: 1.00 (Ref.)                                    | Lower BMI: 1.00 (Ref.)                                                                                      |          |                                                    |                             |                    |                                                                                                                    |                                                                                                                                                                                                                                                                                                                                                                                                                                                                                                                                                                                           |  |       |     |  |                        |                        |  |                                |                                |  |                               |                               |  |                         |  |  |                             |  |  |                               |  |
|                            | Moderate BMI: -.05 [-.16- .05]                            | Moderate BMI: -.06 [-.11- .00]                                                                              |          |                                                    |                             |                    |                                                                                                                    |                                                                                                                                                                                                                                                                                                                                                                                                                                                                                                                                                                                           |  |       |     |  |                        |                        |  |                                |                                |  |                               |                               |  |                         |  |  |                             |  |  |                               |  |
|                            | Higher BMI: -.13 [-.19 - .07]                             | Higher BMI: -.05 [-.10 - .03]                                                                               |          |                                                    |                             |                    |                                                                                                                    |                                                                                                                                                                                                                                                                                                                                                                                                                                                                                                                                                                                           |  |       |     |  |                        |                        |  |                                |                                |  |                               |                               |  |                         |  |  |                             |  |  |                               |  |
|                            | Total less weight gain:                                   |                                                                                                             |          |                                                    |                             |                    |                                                                                                                    |                                                                                                                                                                                                                                                                                                                                                                                                                                                                                                                                                                                           |  |       |     |  |                        |                        |  |                                |                                |  |                               |                               |  |                         |  |  |                             |  |  |                               |  |
|                            | Men – high activity: 2.6 kg                               |                                                                                                             |          |                                                    |                             |                    |                                                                                                                    |                                                                                                                                                                                                                                                                                                                                                                                                                                                                                                                                                                                           |  |       |     |  |                        |                        |  |                                |                                |  |                               |                               |  |                         |  |  |                             |  |  |                               |  |
|                            | Women – high activity: 6.1 kg                             |                                                                                                             |          |                                                    |                             |                    |                                                                                                                    |                                                                                                                                                                                                                                                                                                                                                                                                                                                                                                                                                                                           |  |       |     |  |                        |                        |  |                                |                                |  |                               |                               |  |                         |  |  |                             |  |  |                               |  |

PA = physical activity, MET = metabolic equivalent of task; Ref. = Reference group
